# Supplementary material for: Investigating the efficacy of green solvents and solvent-free conditions in hydrogen-bonding mediated organocatalyzed model reactions
Source: Royal Society of Chemistry journal article supplement (doi:10.1039/d4ra00679h), 2024-01-01
Supplement: d4ra00679h1.pdf [file d4ra00679h1.pdf]

## Contents

|                                                                                                                       |          |
|-----------------------------------------------------------------------------------------------------------------------|----------|
| <b>Supporting Information.....</b>                                                                                    | <b>2</b> |
| <b>General experimental methods .....</b>                                                                             | <b>2</b> |
| <b>Procedure for the sulfenylation of ethyl 2-oxocyclopentane-1-carboxylate.....</b>                                  | <b>3</b> |
| <b>Procedure for the oxidation of thioanisole.....</b>                                                                | <b>4</b> |
| <b>Procedure for the Michael addition of 4-methoxybenzenethiol to chalcone .....</b>                                  | <b>5</b> |
| <b>Procedure for the direct reductive amination of 4-nitrobenzaldehyde and p-anisidine ...</b>                        | <b>7</b> |
| <b>Procedure for the asymmetric Biginelli reaction of 4-nitrobenzaldehyde, thiourea, and ethyl acetoacetate .....</b> | <b>8</b> |

## Supporting Information

### General experimental methods

Reagents and solvents were purchased from Sigma Aldrich, DLD scientific, and Merck and unless otherwise noted used without further purification. All solvents were reagent grade or better. Deuterated solvents were used as received. Dry ice was made from with tech grade-wet CO<sub>2</sub> (90%). Thin layer chromatography (TLC) was performed using Merck Kieselgel 60 F254 plates. Synthetic steps were characterised using LC-MS (Shimadzu 2020 UFLC-MS, Japan) or GC-MS-QP2010 Ultra (Shimadzu, Japan). Chiral HPLC (Agilent technologies) was used for the determination of enantiomeric excess. NMR data were recorded using a Bruker AVANCE III 600 MHz at room temperature. The NMR chemical shifts ( $\delta$ ) are reported in parts per million (ppm) relative to the residual solvent peak (<sup>1</sup>H-NMR  $\delta$  7.26 for CDCl<sub>3</sub>,  $\delta$  3.31 for CD<sub>3</sub>OD; <sup>13</sup>C-NMR  $\delta$  77.0 for CDCl<sub>3</sub>,  $\delta$  49.00 for CD<sub>3</sub>OD). <sup>13</sup>C NMR is the APT experiment. The APT experiment yields methine (CH) and methyl (CH<sub>3</sub>) signals positive and quaternary (C) and methylene (CH<sub>2</sub>) signals negative.

# Procedure for the sulfenylation of ethyl 2-oxocyclopentane-1-carboxylate

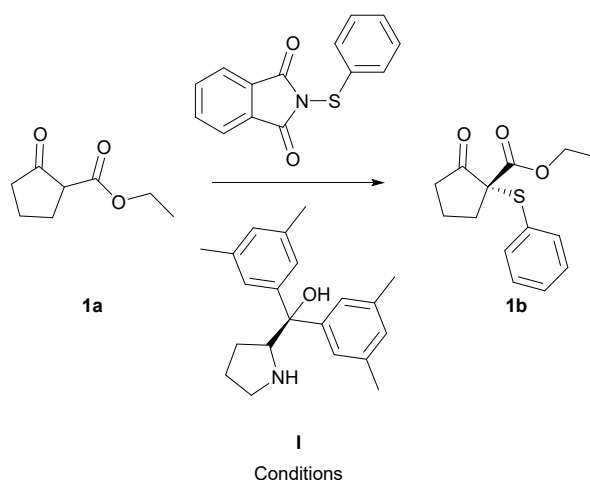

Scheme 1: Synthesis of Ethyl 2-oxo-1-(phenylthio)cyclopentanecarboxylate (**1b**).

## Procedure A: Green solvent

A mixture of ethyl 2-oxocyclopentane-1-carboxylate (**1a**, 0.19 mmol), N-(Phenylthio)phthalimide (1.2 equiv.), (S)- $\alpha,\alpha$ -Bis(3,5-dimethylphenyl)-2-pyrrolidinemethanol (**I**, 5 mol%), and green solvent (0.1 M) were added into a 10 mL microwave reaction tube. The reaction was stirred for 3 hours at RT. Thereafter, the solvent was evaporated under reduced pressure. The crude mixture was purified by flash column chromatography using a mixture of ethyl acetate (0-5%) in hexane (100-95%).

## Procedure B: Liquid CO<sub>2</sub>

A mixture of ethyl 2-oxocyclopentane-1-carboxylate (**1a**, 0.19 mmol), N-(Phenylthio)phthalimide (1.2 equiv.), (S)- $\alpha,\alpha$ -Bis(3,5-dimethylphenyl)-2-pyrrolidinemethanol (**I**, 5 mol%), and dry ice (CO<sub>2</sub>, 2g) were added into a 10 mL microwave reaction tube and placed into a high-pressure reaction vessel (Parr instrument company, USA). The reaction vessel was then placed in water bath at 25 °C to warm up. The vessel was left to stir at RT for 3 hours. Thereafter, the reaction vessel was placed in an ice bath to cool, and the pressure was released. Hexane was added to the microwave reaction tube and the crude mixture was purified by flash column chromatography using a mixture of ethyl acetate (0-5%) in hexane (100-95%).

## Ethyl 2-oxo-1-(phenylthio)cyclopentanecarboxylate (**1b**)<sup>1</sup>

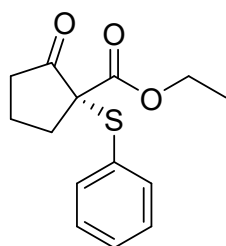

Compound **1b** was prepared according to the preceding general procedure. White solid. Yield: 99%.

<sup>1</sup>H NMR (600 MHz, CDCl<sub>3</sub>): δ = 1.25 (t, 3H), 1.94-2.15 (m, 3H), 2.34-2.60 (m, 3H), 4.2 (m, 2H), 7.3-7.38 (m, 3H), 7.54-7.55 (m, 2H).

<sup>13</sup>C NMR (150 MHz, CDCl<sub>3</sub>): δ = 14.1, 19.1, 35.0, 37.0, 62.5, 64.8, 129.0, 129.7, 130.3, 136.4, 169.4, 207.3

Enantiomeric excess: 84%, determined by HPLC (CHIRALART Cellulose-SC, hexane/isopropanol = 99:1, flow rate 1 mL/min): t<sub>R</sub> = 19.63 min (minor), t<sub>R</sub> = 21.52 min (minor)

## Procedure for the Michael addition of 4-methoxybenzenethiol to chalcone

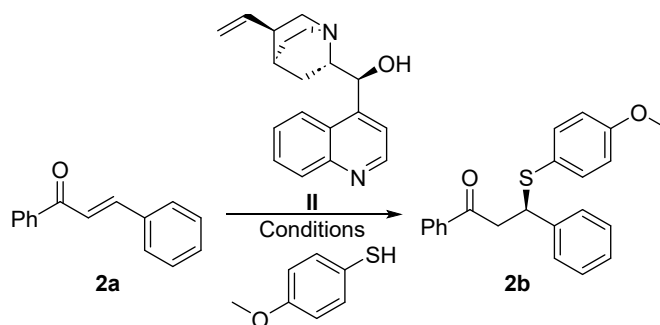

Scheme 2: Synthesis of 3-((4-methoxyphenyl)thio)-1,3-diphenylpropan-1-one (**2b**).

### Procedure A: Green solvent

A mixture of *trans*-chalcone (**2a**, 0.24 mmol), 4-Methoxythiophenol (1.1 equiv.), cinchonine (**II**, 1.5 mol%), and green solvent (0.33 M) were added into a 10 mL microwave reaction tube. The reaction was stirred for 4 hours at -20 °C. Thereafter, the solvent was evaporated under reduced pressure. The crude mixture was purified by flash column chromatography using a mixture of ethyl acetate (0-10%) in hexane (100-90%).

### Procedure B: Liquid CO<sub>2</sub>

A mixture of *trans*-chalcone (**2a**, 0.24 mmol), 4-Methoxythiophenol (1.1 equiv.), cinchonine (**II**, 1.5 mol%), and dry ice (CO<sub>2</sub>, 2g) were added into a 10 mL microwave reaction tube and placed into a high-pressure reaction vessel. The vessel was left to stir at -20 °C for 4 hours. Thereafter, the reaction vessel was placed in an ice bath to cool, and the pressure was released. Hexane was added to the microwave reaction tube and the crude mixture was purified by flash column chromatography using a mixture of ethyl acetate (0-10%) in hexane (100-90%).

### 3-((4-methoxyphenyl)thio)-1,3-diphenylpropan-1-one (**2b**)<sup>2</sup>

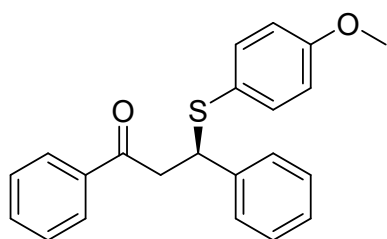

Compound **2b** was prepared according to the preceding general procedure. White solid. Yield: 85%.

<sup>1</sup>H NMR (600 MHz, CDCl<sub>3</sub>): δ = 3.54-3.63 (m, 2H), 3.76 (s, 3H), 4.76-4.78 (t, 1H), 6.75 (d, 2H), 7.16-7.26 (m, 7H), 7.43 (t, 2H), 7.54 (t, 1H), 7.87 (d, 2H).

<sup>13</sup>C NMR (150 MHz, CDCl<sub>3</sub>): δ = 44.4, 49.5, 55.4, 114.5, 124.4, 127.4, 128.0, 128.2, 128.5, 128.7, 133.3, 136.4, 137.0, 141.5, 160.0, 197.3.

Enantiomeric excess: 40%, determined by HPLC (CHIRALART Cellulose-SB, hexane/isopropanol = 90:10, flow rate 0.5 mL/min): t<sub>R</sub> = 21.53 min (minor), t<sub>R</sub> = 22.76 min (minor)

## Procedure for the asymmetric Biginelli reaction of 4-nitrobenzaldehyde, thiourea, and ethyl acetoacetate

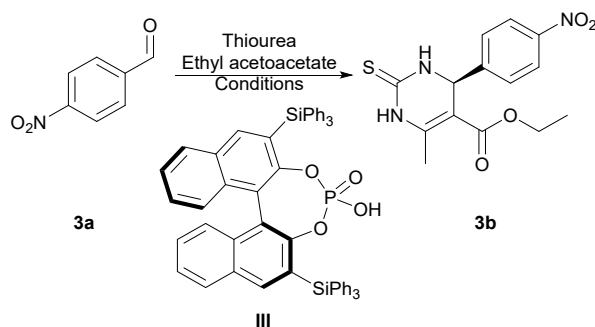

Scheme 3: Synthesis of Ethyl-6-methyl-4-(4-nitrophenyl)-2-thioxo-1,2,3,4-tetrahydropyrimidine-5-carboxylate (**3b**).

### Procedure A: Green solvent

A mixture of 4-nitrobenzaldehyde (**3a**, 0.03 mmol), thiourea (1.2 equiv.), (S)-3,3'-Bis(triphenylsilyl)-1,1'-binaphthyl-2,2'-diyl hydrogenphosphate (**III**, 10 mol%), and green solvent (0.1 M), were added into a 10 mL microwave reaction tube. The reaction was stirred for 1 hour at RT. Thereafter, ethyl acetoacetate (3 equiv.) was added to the reaction and the reaction was stirred for 60 hour at 50 °C. Thereafter, the solvent was evaporated under reduced pressure. The crude mixture was purified by flash column chromatography using a mixture of ethyl acetate (0-30%) in hexane (100-70%).

### Procedure B: scCO<sub>2</sub>

A mixture of 4-nitrobenzaldehyde (**3a**, 0.03 mmol), thiourea (1.2 equiv.), ethyl acetoacetate (3 equiv.), (S)-3,3'-Bis(triphenylsilyl)-1,1'-binaphthyl-2,2'-diyl hydrogenphosphate (**III**, 10 mol%), and dry ice (CO<sub>2</sub>, 2g) were added into a 10 mL microwave reaction tube and placed into a high-pressure reaction vessel. The vessel was then placed in a preheated oil bath left to stir at 50 °C for 60 hours. Thereafter, the reaction vessel was placed in an ice bath to cool, and the pressure was released. Acetonitrile was added to the microwave reaction tube and the crude mixture was submitted for LC-MS analysis.

**Ethyl-6-methyl-4-(4-nitrophenyl)-2-thioxo-1,2,3,4-tetrahydropyrimidine-5-carboxylate (3b)<sup>3</sup>**

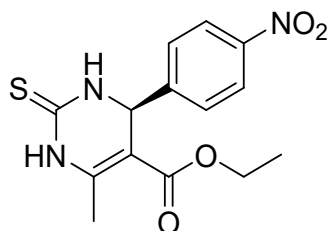

Compound **3b** was prepared according to the preceding general procedure. white solid. Yield: 98%.

<sup>1</sup>H NMR (600 MHz, CDCl<sub>3</sub>): δ = 1.20 (t, 3H), 2.38 (s, 3H), 4.11-4.13 (m, 2H), 5.51 (d, 1H), 7.48 (d, 2H), 7.74 (brs, 1H), 8.13 (brs, 1H), 8.19 (d, 2H).

<sup>13</sup>C NMR (150 MHz, CDCl<sub>3</sub>): δ = 14.3, 18.7, 55.6, 61.0, 102.3, 124.4, 127.9, 143.7, 147.9, 149.1, 165.0, 175.1.

Enantiomeric excess: 92%, determined by HPLC (CHIRALART Cellulose-SC, hexane/isopropanol = 70:30, flow rate 0.5 mL/min): tR = 13.90 min (major), tR = 15.66 min (minor)

## Procedure for the direct reductive amination of 4-nitrobenzaldehyde and p-anisidine

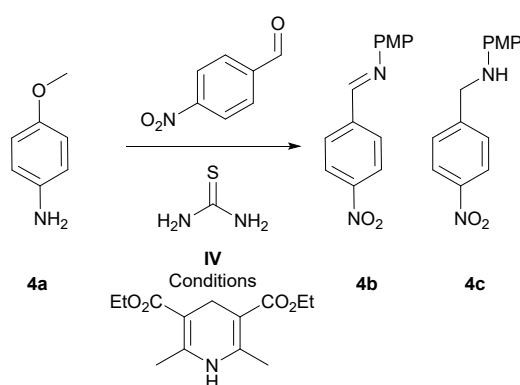

Scheme 4: Synthesis of 4-methoxy-N-(4-nitrobenzyl)aniline (**4c**).

### Procedure A: Green solvent

A mixture of p-Anisidine (**4a**, 0.24 mmol), 4-nitrobenzaldehyde (1.2 equiv.), Hantzsch ester (1.2 equiv.), thiourea (**IV**, 10 mol%), and green solvent (0.4 M) were added into a 10 mL microwave reaction tube. The reaction was stirred for 16 hours at 70 °C. Thereafter, water was

added to the reaction mixture to precipitate the product. The crude mixture was purified by flash column chromatography using a mixture of ethyl acetate (0-10%) in hexane (100-90%).

### Procedure B: Liquid CO<sub>2</sub>

A mixture of p-Anisidine (**4a**, 0.24 mmol), 4-nitrobenzaldehyde (1.2 equiv.), Hantzsch ester (1.2 equiv.), thiourea (**IV**, 10 mol%), and dry ice (CO<sub>2</sub>, 2g) were added into a 10 mL microwave reaction tube and placed into a high-pressure reaction vessel. The vessel was then placed in a preheated oil bath left to stir at 70 °C for 16 hours. Thereafter, the reaction vessel was placed in an ice bath to cool, and the pressure was released. Acetonitrile was added to the microwave reaction tube and the crude mixture was submitted for GC-MS analysis.

### 4-methoxy-N-(4-nitrobenzyl)aniline (**4c**)<sup>4</sup>

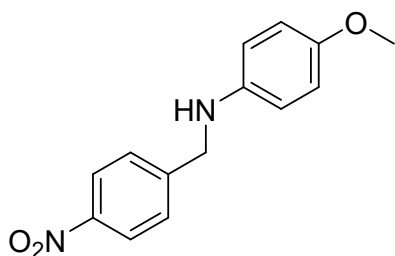

Compound **4c** was prepared according to the preceding general procedure. yellow solid. Yield: 90%.

<sup>1</sup>H NMR (600 MHz, CD<sub>3</sub>OD): δ = 3.67 (s, 3H), 4.39 (s, 2H), 6.56 (m, 2H), 6.70 (m, 2H), 7.58 (d, 2H), 8.16 (d, 2H).

<sup>13</sup>C NMR (150 MHz, CD<sub>3</sub>OD): δ = 48.7, 56.2, 115.4, 115.9, 124.5, 129.2, 143.6, 148.3, 150.2, 153.6.

## Procedure for the oxidation of thioanisole

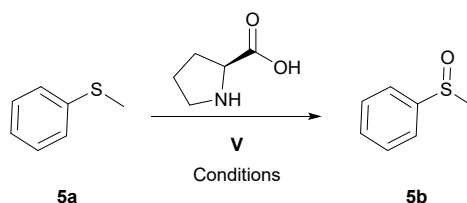

Scheme 5: Synthesis of methyl phenyl sulfoxide (**5b**).

### Procedure A: Green solvent

A mixture of thioanisole (**5a**, 0.24 mmol), L-proline (**V**, 0.01 equiv.), H<sub>2</sub>O<sub>2</sub> (2.5 equiv.), and green solvent (3.8 M) were added into a 10 mL microwave reaction tube and placed into a



preheated oil bath. The reaction was stirred for 2 hours at 40 °C. Thereafter, the mixture was extracted with ethyl acetate. The resultant organic layer was dried over anhydrous MgSO<sub>4</sub>, and the solvent was evaporated under reduced pressure.

#### Procedure B: scCO<sub>2</sub>

A mixture of thioanisole (**5a**, 0.24 mmol), L-proline (**V**, 0.01 equiv.), H<sub>2</sub>O<sub>2</sub> (2.5 equiv.), and dry ice (CO<sub>2</sub>, 2g) were added into a 10 mL microwave reaction tube and placed into a high-pressure reaction vessel. The reaction vessel was then placed in an oil bath preheated to 40 °C. The temperature was maintained by an external temperature probe connected to a digital hot plate. The pressure was monitored by a pressure gauge attached to the reaction vessel. After 2 hours, the high-pressure reaction vessel was placed in an ice bath to cool, and the pressure was released. Thereafter, acetonitrile was added to the microwave vessel, and the mixture was submitted for LC-MS analysis.

#### Methyl phenyl sulfoxide (**5b**)<sup>5</sup>

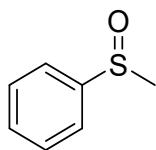

Compound **5b** was prepared according to the preceding general procedure. White solid. Yield: 99%.

<sup>1</sup>H NMR (600 MHz, CDCl<sub>3</sub>): δ = 2.71 (s, 3H), 7.49-7.53 (m, 3H), 7.63 (d, 2H).

<sup>13</sup>C NMR (150 MHz, CDCl<sub>3</sub>): δ = 44.0, 123.6, 129.5, 131.1, 145.8.

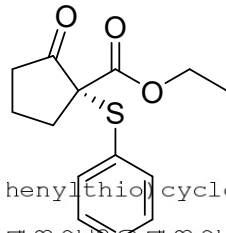

ethyl 2-(4-(benylthio)cyclopentanecarboxylate

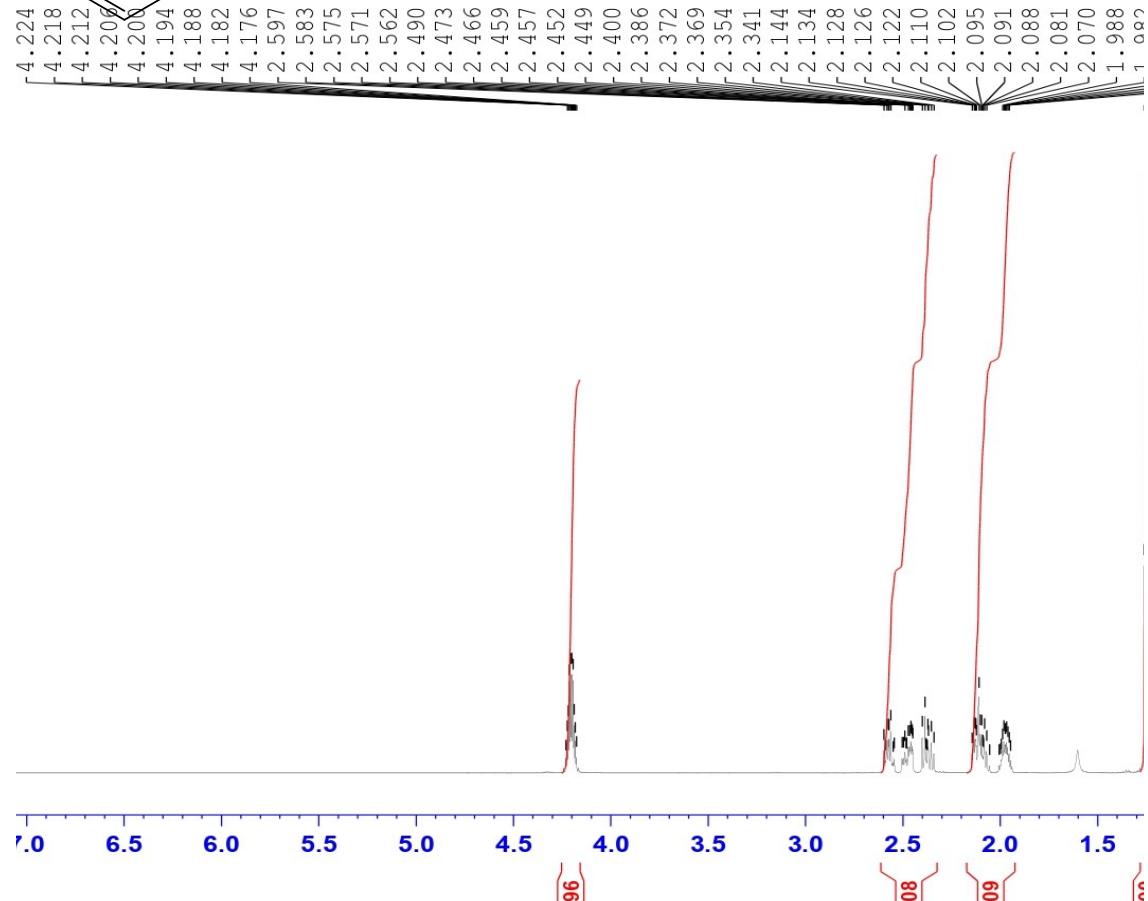

**<sup>1</sup>H NMR of Ethyl 2-oxo-1-(phenylthio)cyclopentanecarboxylate in CDCl<sub>3</sub> (1b)**

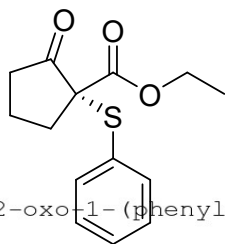

Ethyl 2-oxo-1-(phenylthio)cyclopentanecarboxylate

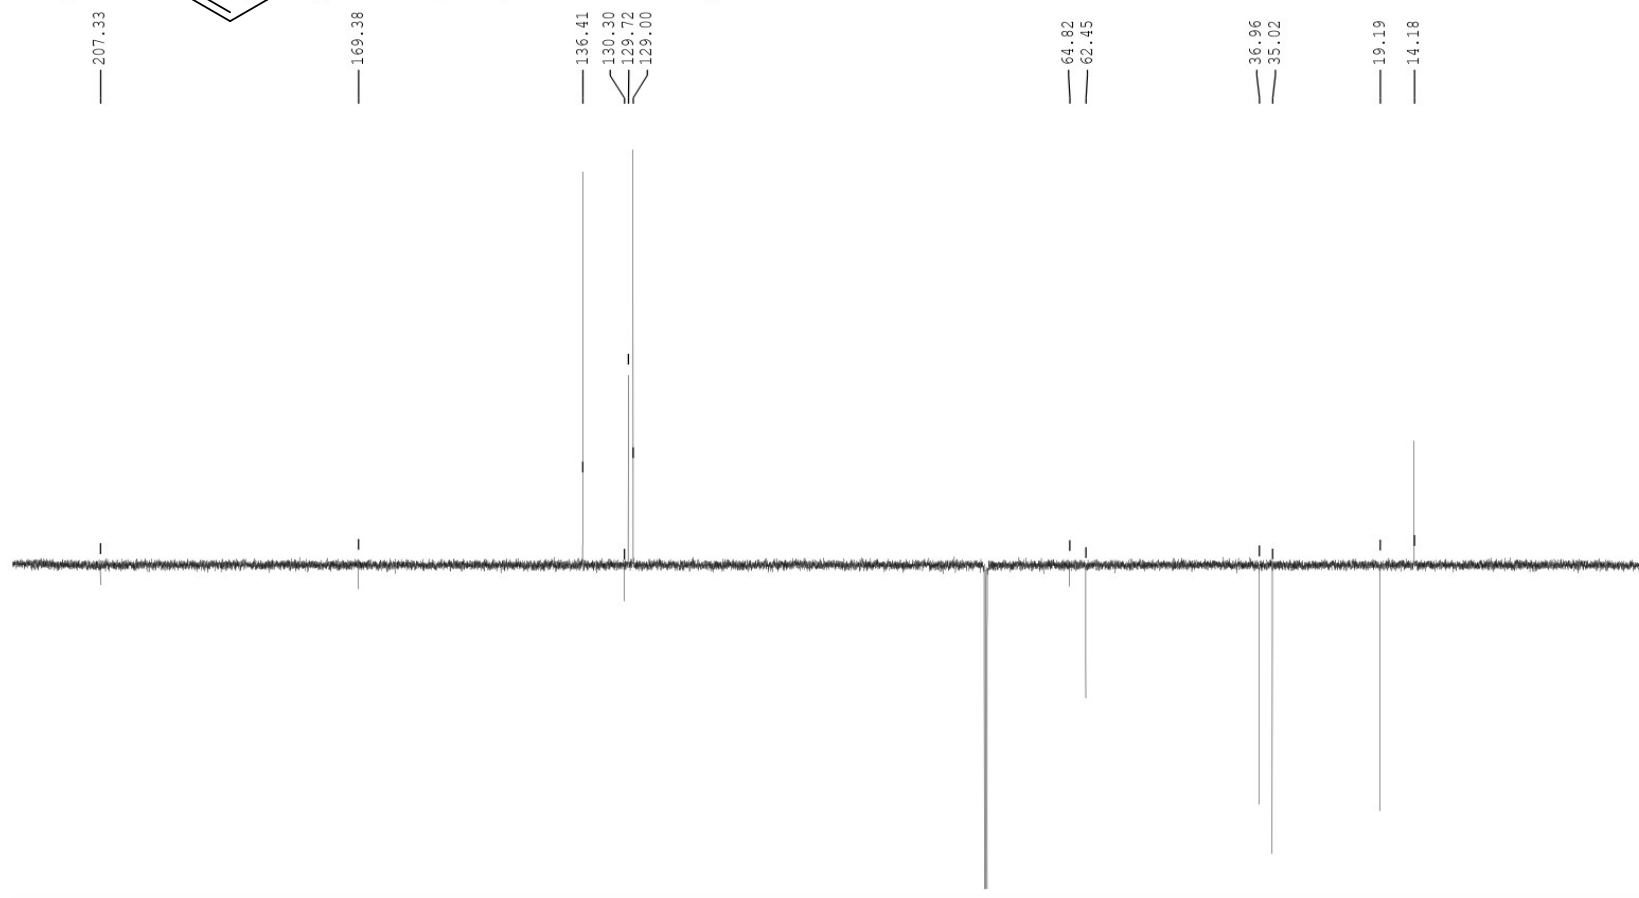

**$^{13}\text{C}$  NMR of Ethyl 2-oxo-1-(phenylthio)cyclopentanecarboxylate in  $\text{CDCl}_3$  (1b)**

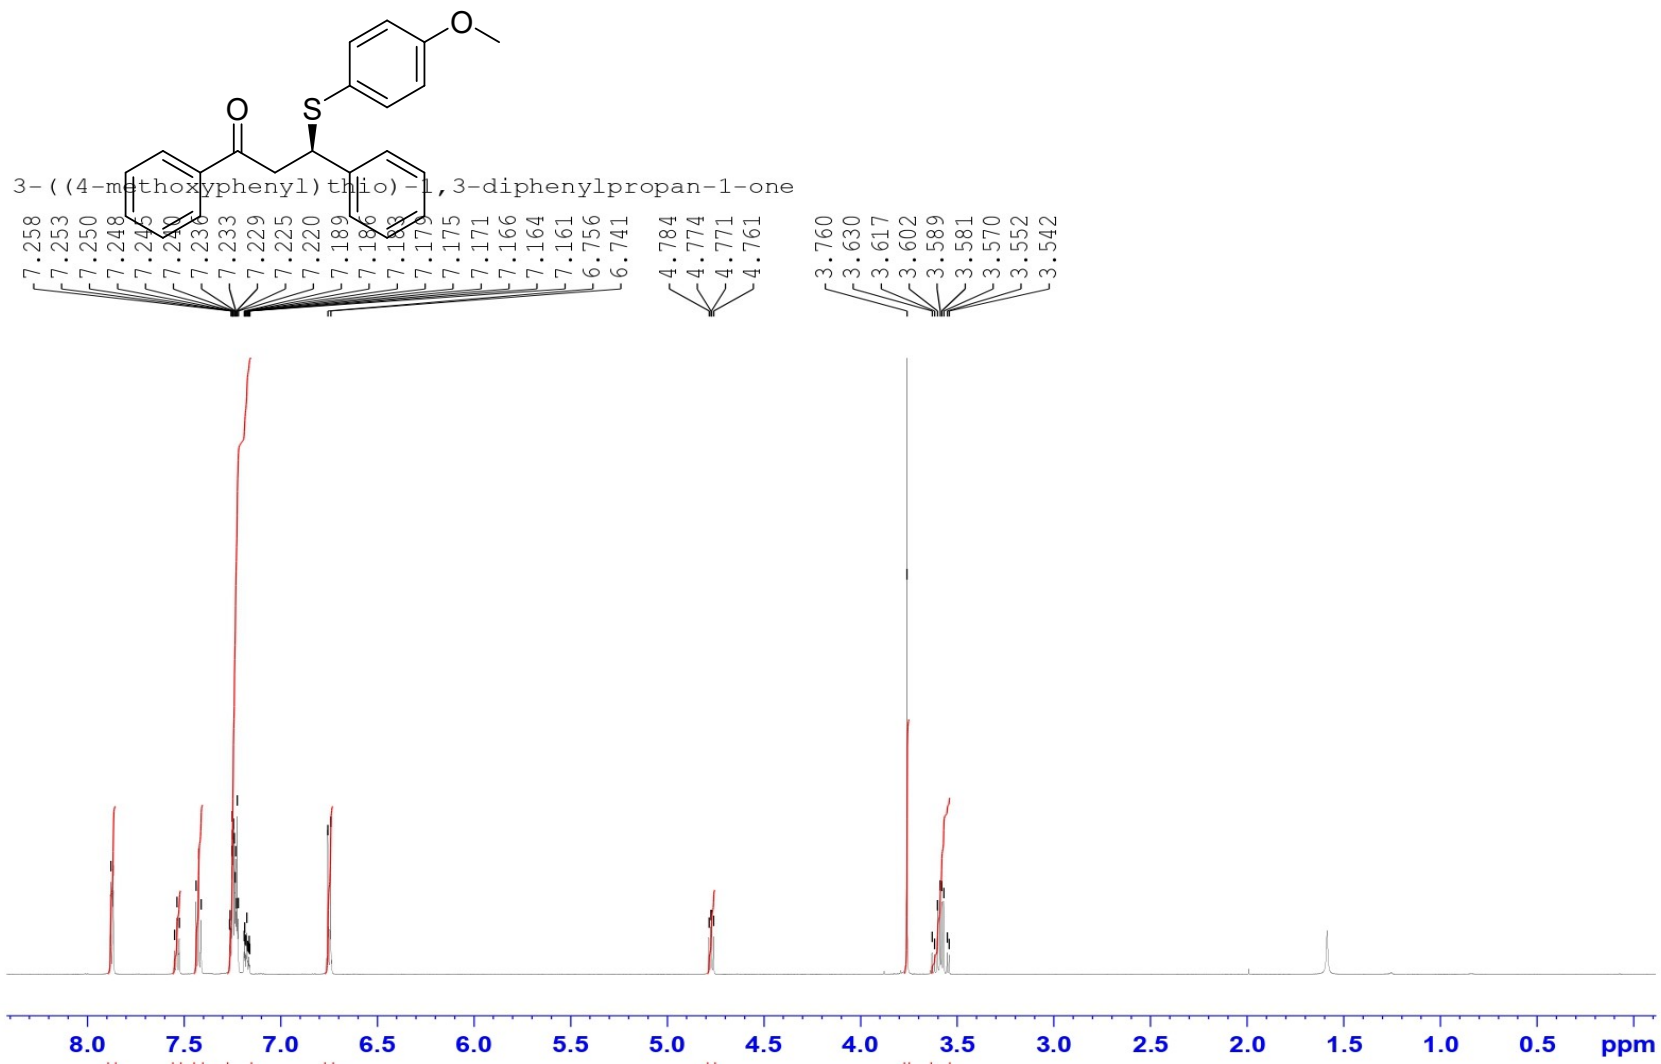

**<sup>1</sup>H NMR of 3-((4-methoxyphenyl)thio)-1,3-diphenylpropan-1-one in CDCl<sub>3</sub> (2b)**

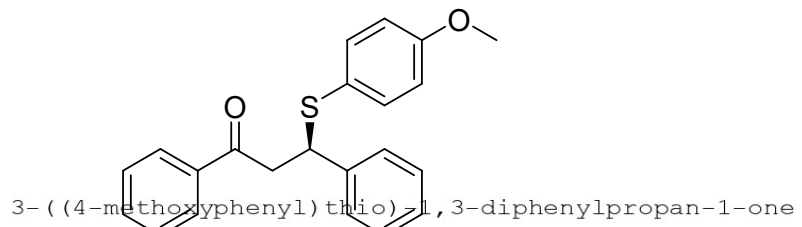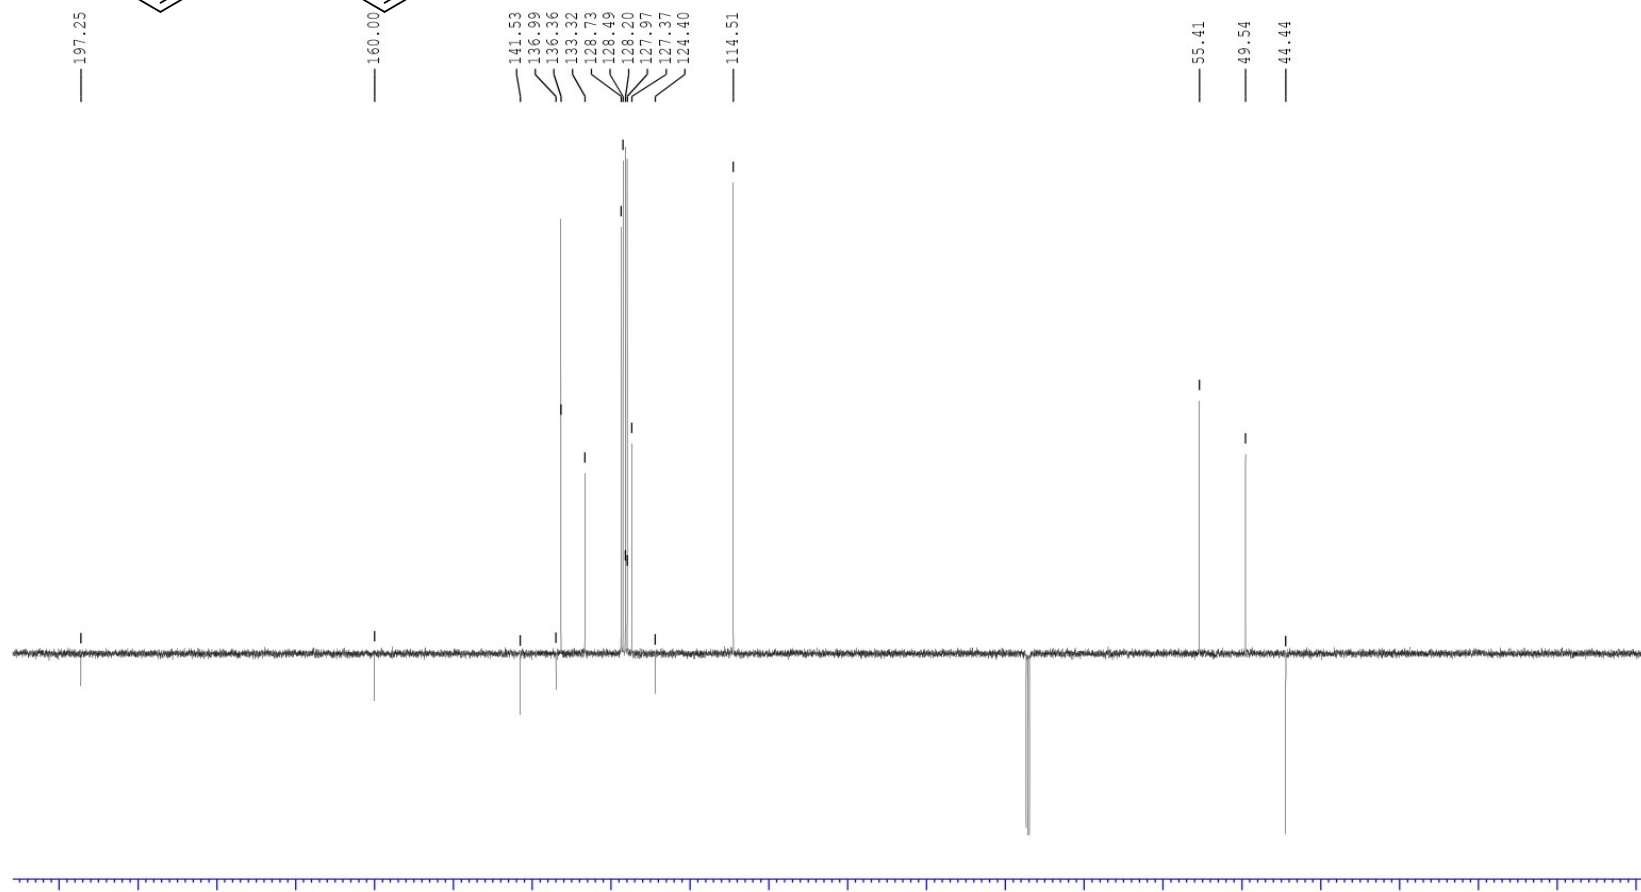



**$^{13}\text{C}$  NMR of 3-((4-methoxyphenyl)thio)-1,3-diphenylpropan-1-one in  $\text{CDCl}_3$  (2b)**

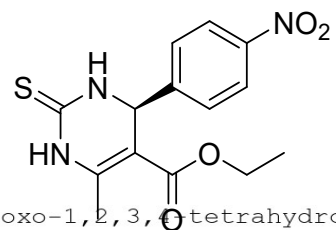

ethyl 2-(4-nitrophenyl)-6-methyl-4-(2-thioxo-1,2,3,4-tetrahydropyrimidin-5-yl)acetate

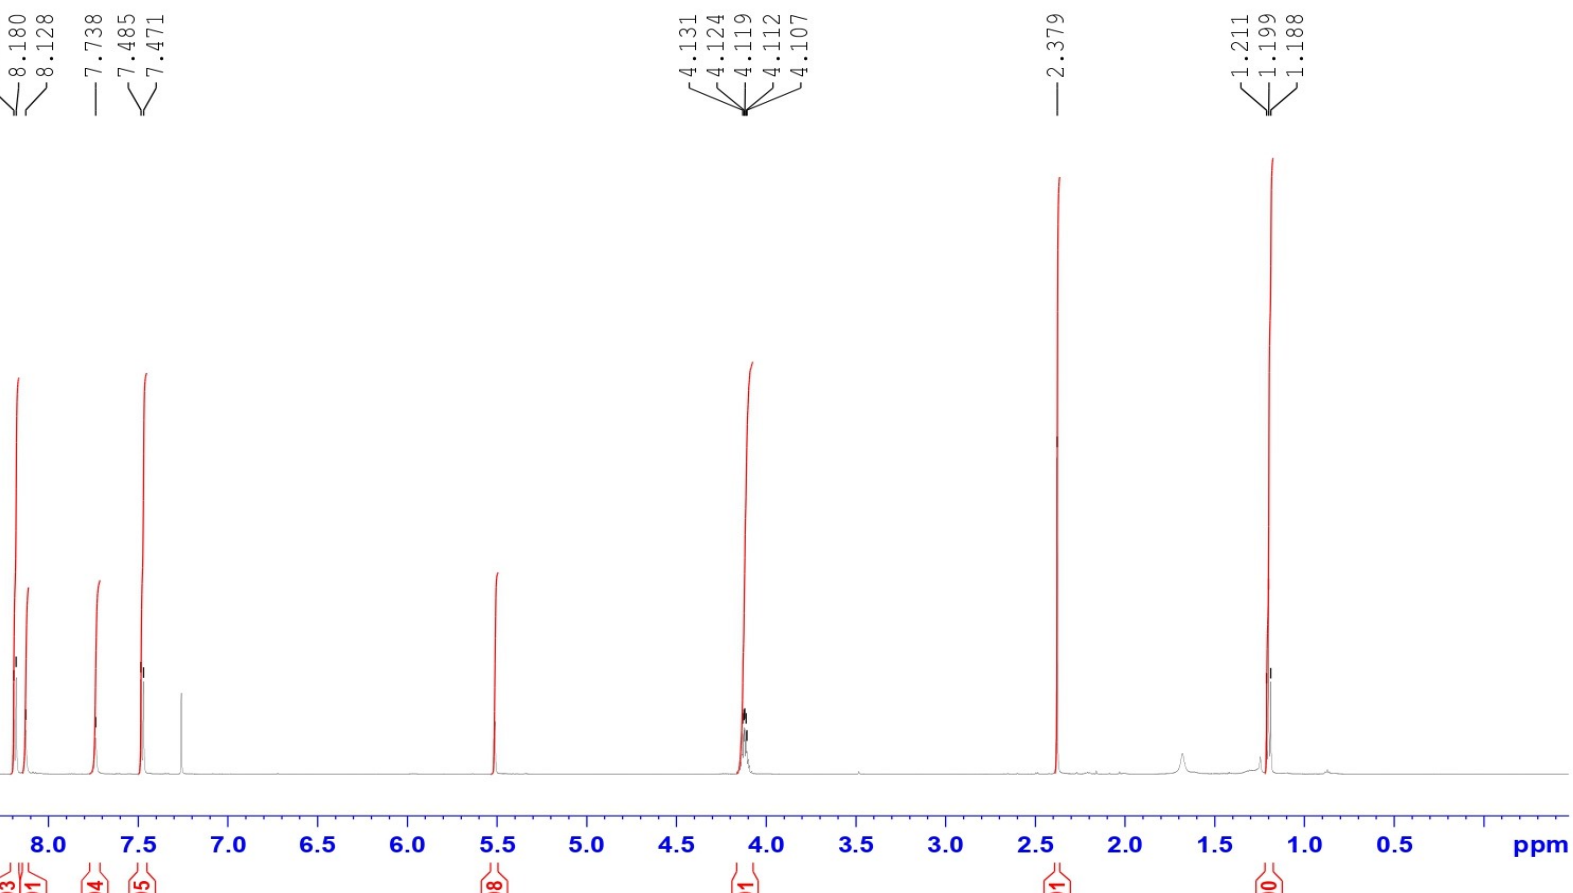

**1,2,3,4-tetrahydropyrimidine-5-carboxylate in CDCl<sub>3</sub> (3b)**

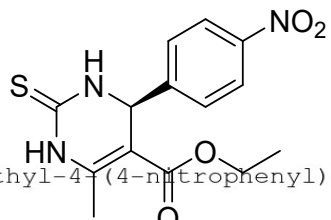

Ethyl-6-methyl-4-(4-nitrophenyl)-2-thioxo-1,2,3,4-tetrahydropyrimidine-5-carbox

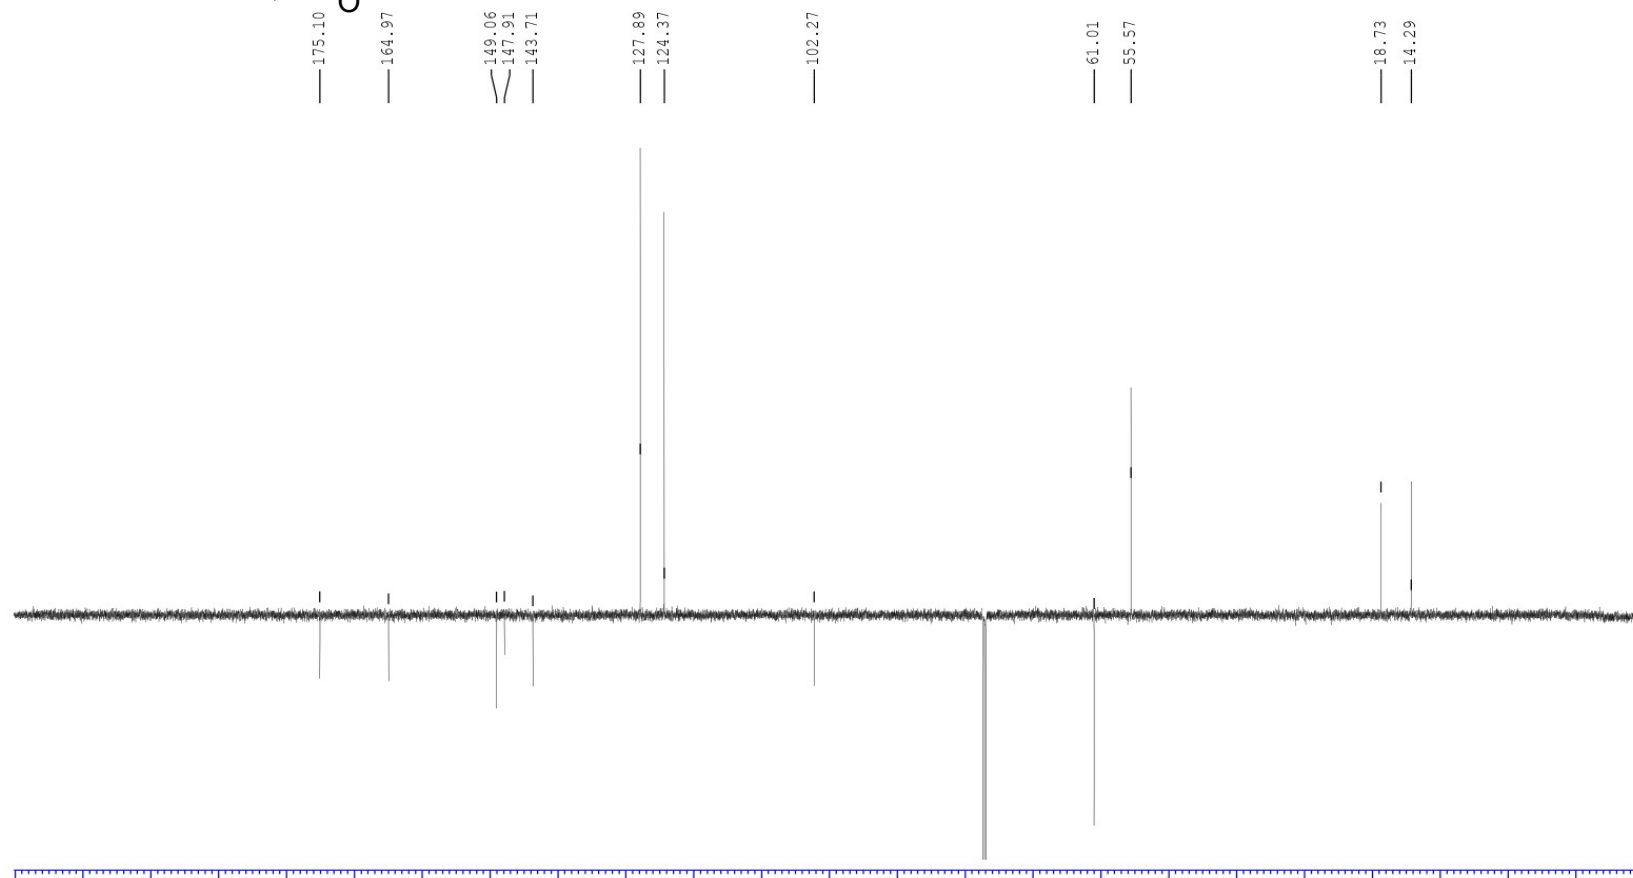

**<sup>13</sup>C NMR of Ethyl-6-methyl-4-(4-nitrophenyl)-2-thioxo-1,2,3,4-tetrahydropyrimidine-5-carboxylate in CDCl<sub>3</sub> (3b)**

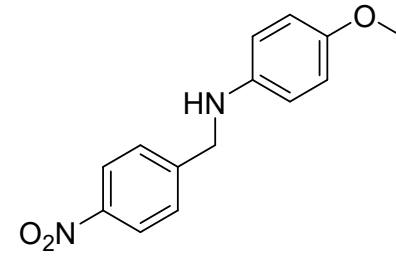

4-methoxy-N-(4-nitrobenzyl)aniline

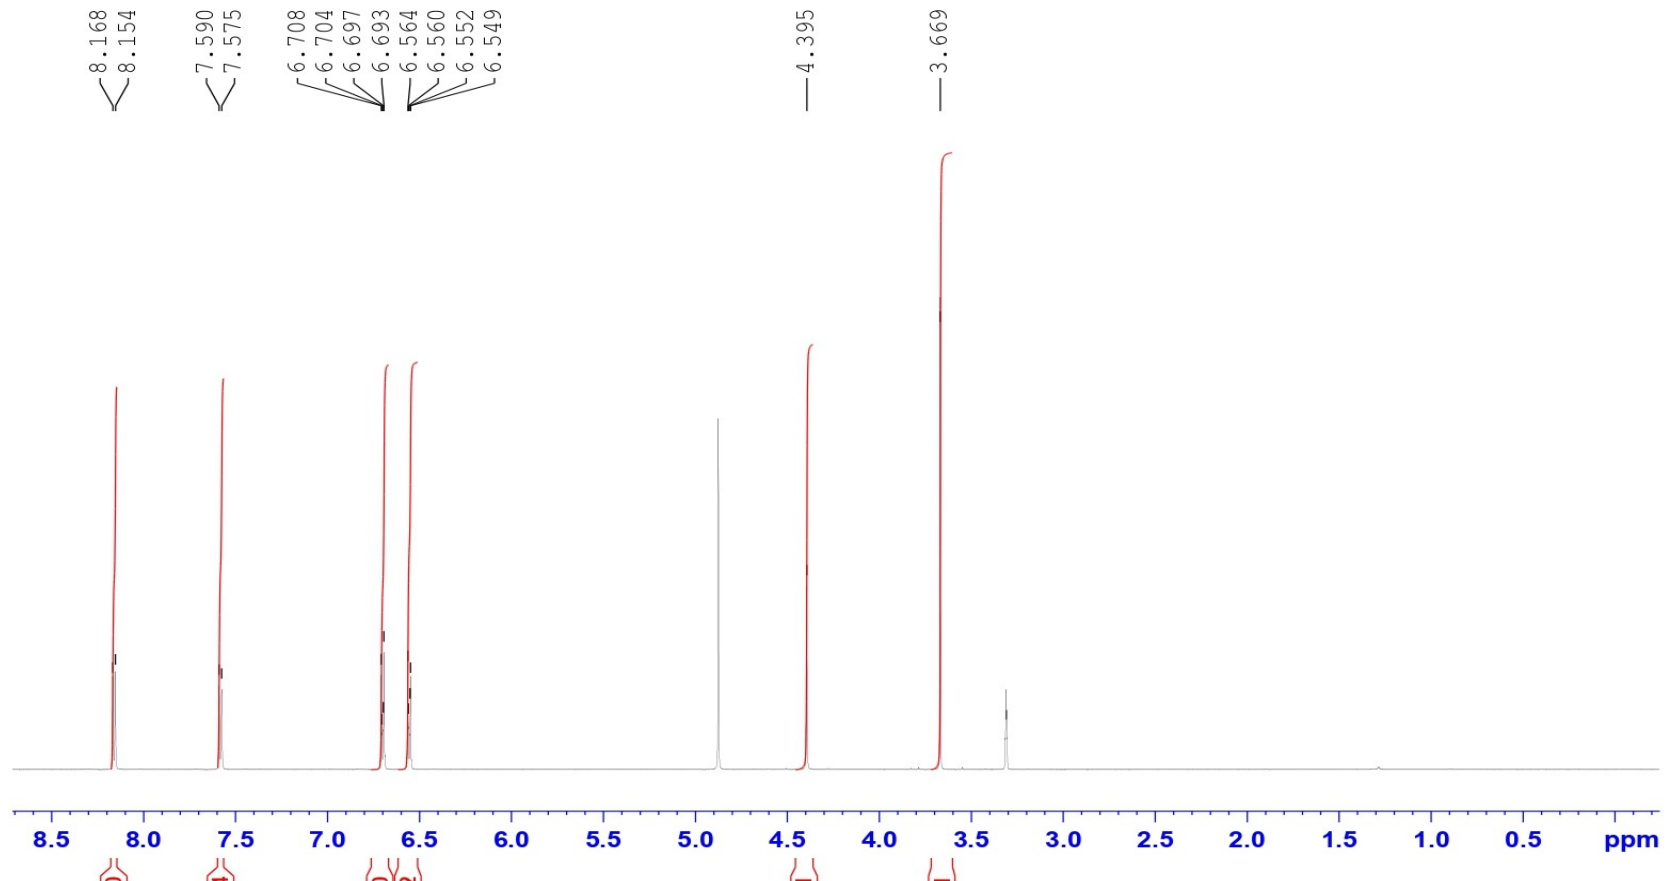

**<sup>1</sup>H NMR of 4-methoxy-N-(1-phenylethyl)aniline in CD<sub>3</sub>OD (4b)**

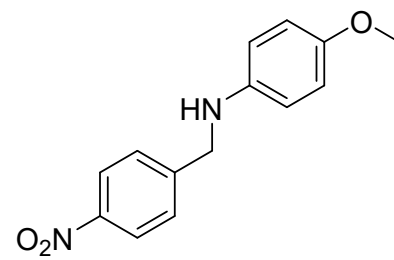

4-methoxy-N-(1-phenylethyl) aniline

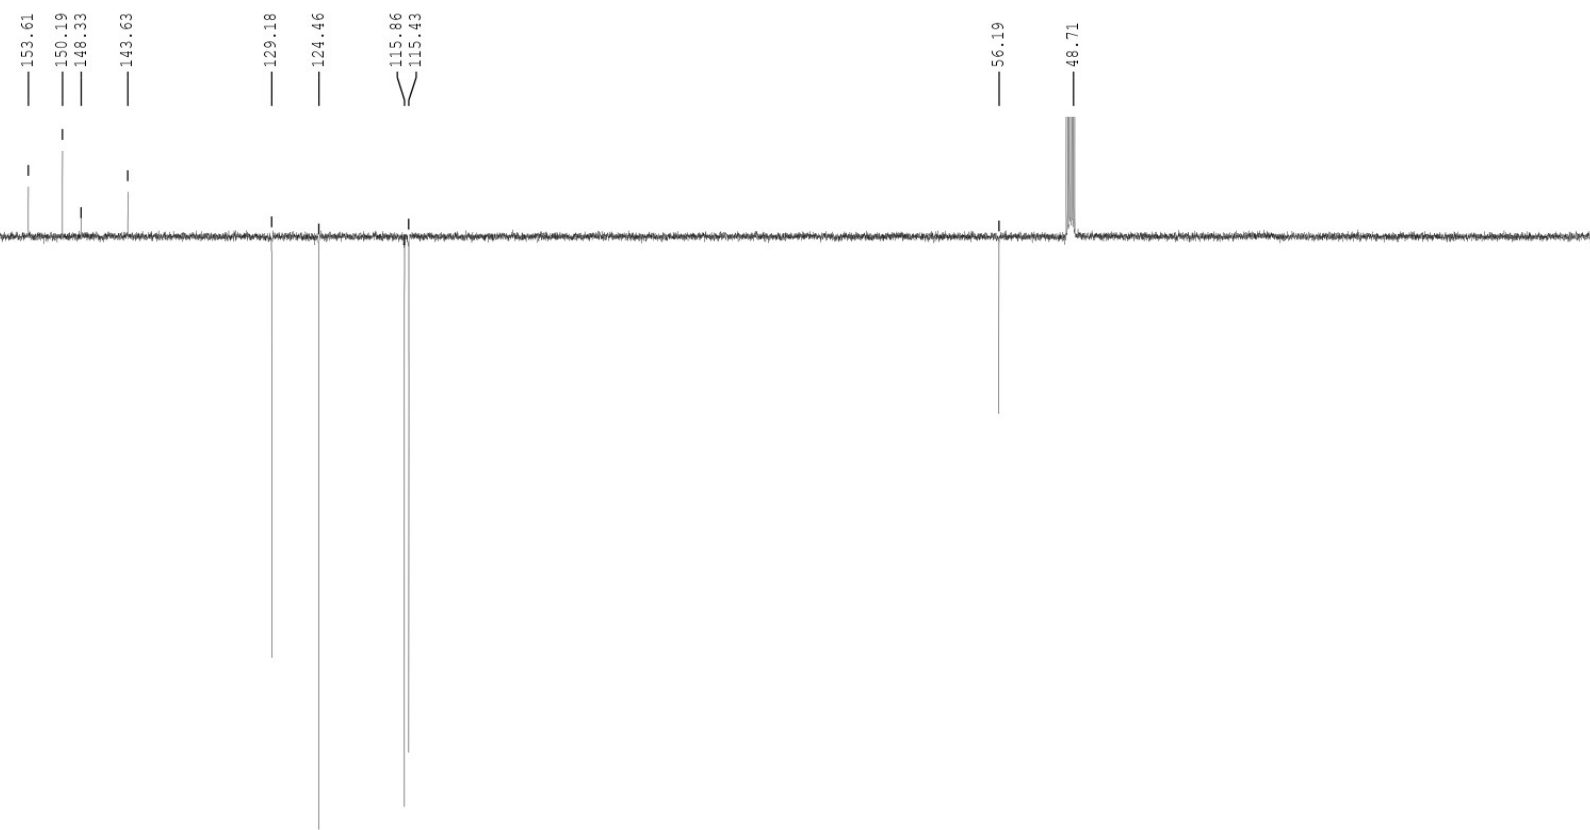



**CD<sub>3</sub>OD(4b)**

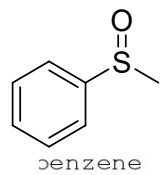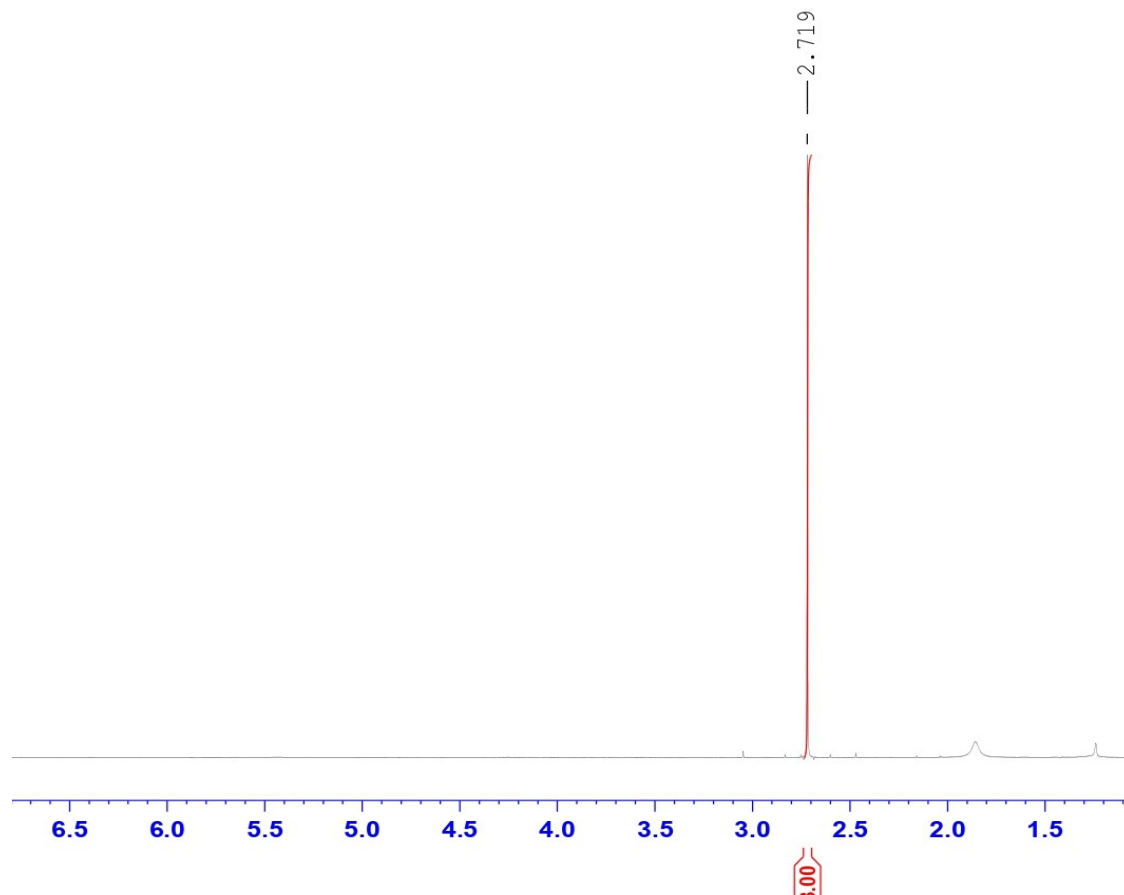

**$^1\text{H}$  NMR of methyl phenyl sulfoxide in  $\text{CDCl}_3$  (5b)**

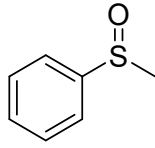

foxide

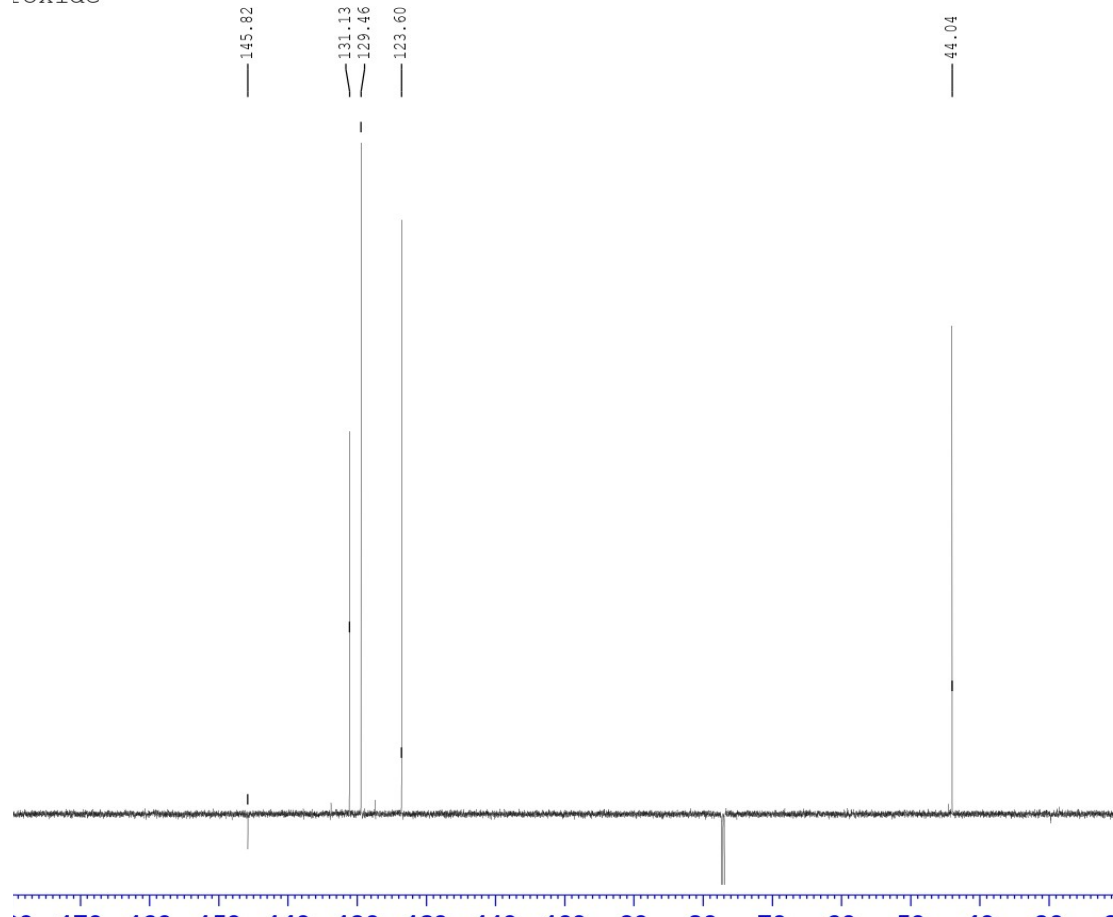

### $^{13}\text{C}$ NMR of methyl phenyl sulfoxide in $\text{CDCl}_3$ (5b)

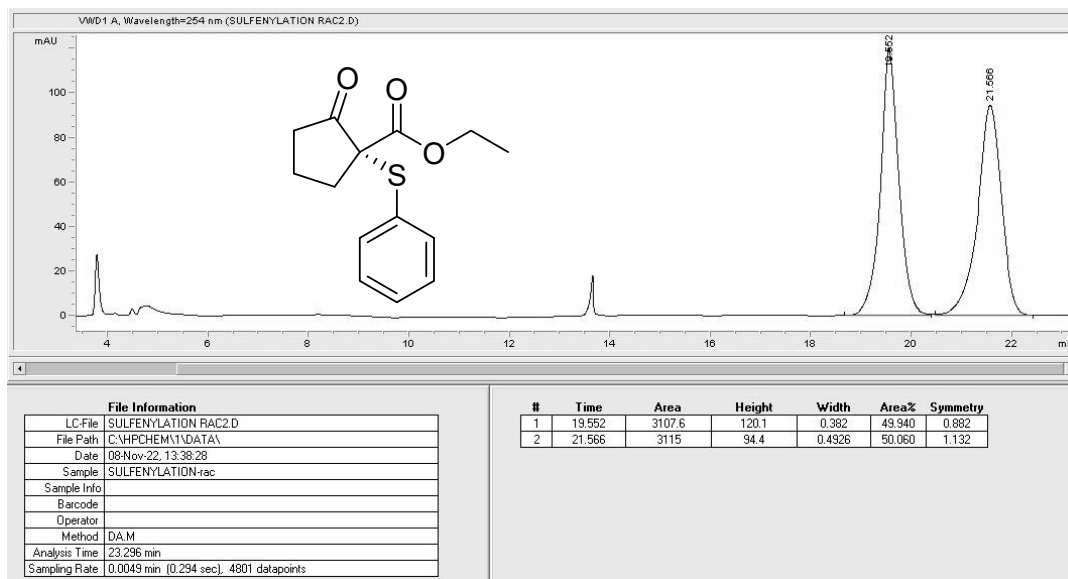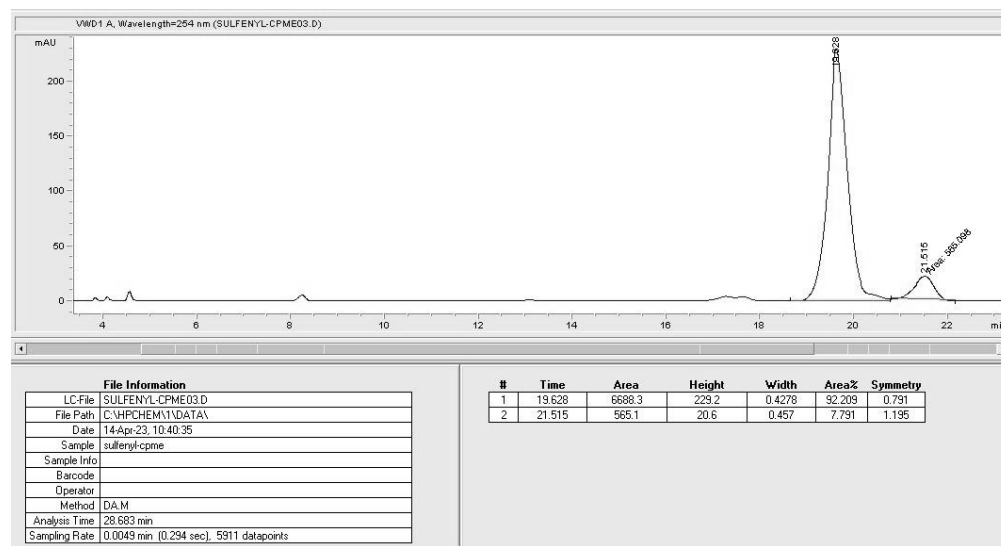

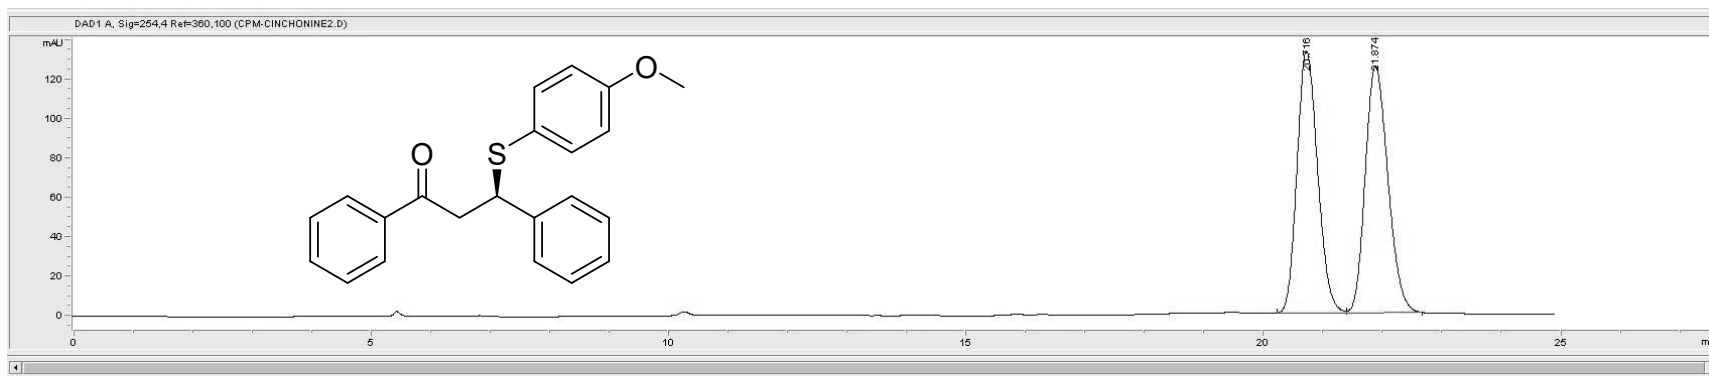

**File Information**

|               |                                         |
|---------------|-----------------------------------------|
| LC-File       | CPM-CINCHONINE2.D                       |
| File Path     | C:\CHEM32\1\DATA\                       |
| Date          | 08-Mar-23, 16:52:57                     |
| Sample        | cpme-cinchonine                         |
| Sample Info   | cpme-cinchonine                         |
| Barcode       |                                         |
| Operator      |                                         |
| Method        | DEF_LC2.M                               |
| Analysis Time | 24.933 min                              |
| Sampling Rate | 0.0067 min (0.402 sec), 3741 datapoints |

| # | Time   | Area   | Height | Width  | Area%  | Symmetry |
|---|--------|--------|--------|--------|--------|----------|
| 1 | 20.716 | 3216.9 | 133.1  | 0.376  | 49.100 | 0.813    |
| 2 | 21.874 | 3334.9 | 125.3  | 0.4164 | 50.900 | 0.773    |

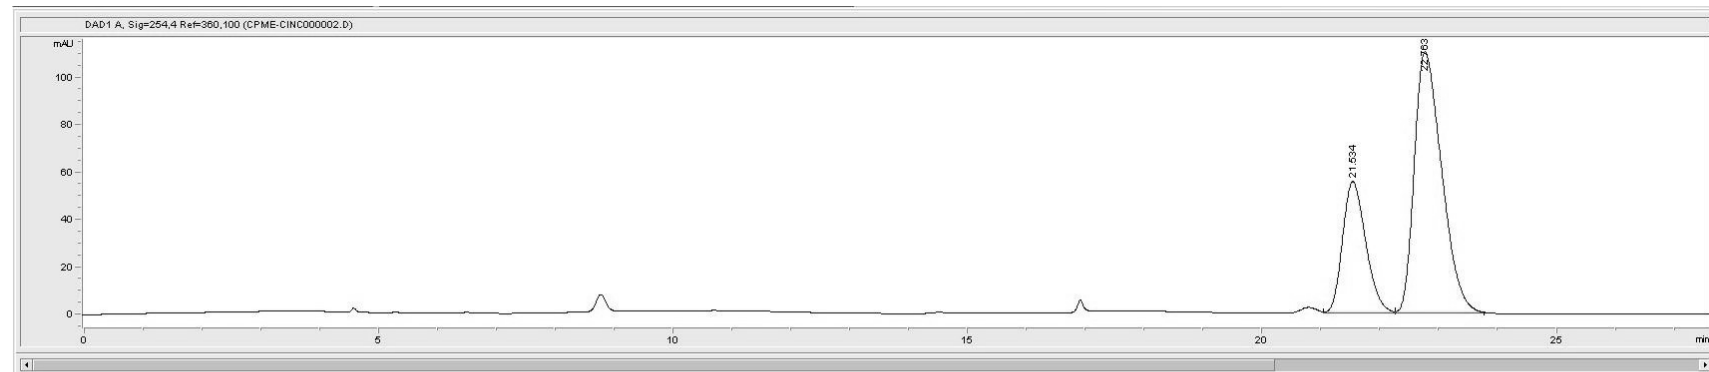

**File Information**

|               |                                         |
|---------------|-----------------------------------------|
| LC-File       | CPME-CINC000002.D                       |
| File Path     | C:\CHEM32\1\DATA\                       |
| Date          | 05-Apr-23, 09:55:26                     |
| Sample        | cpme-CINC                               |
| Sample Info   | cpme-CINC                               |
| Barcode       |                                         |
| Operator      |                                         |
| Method        | DEF_LC2.M                               |
| Analysis Time | 37.08 min                               |
| Sampling Rate | 0.0067 min (0.402 sec), 5563 datapoints |

| # | Time   | Area   | Height | Width  | Area%  | Symmetry |
|---|--------|--------|--------|--------|--------|----------|
| 1 | 21.534 | 1525.8 | 55.5   | 0.4266 | 29.932 | 0.747    |
| 2 | 22.763 | 3571.7 | 110.3  | 0.4858 | 70.068 | 0.616    |

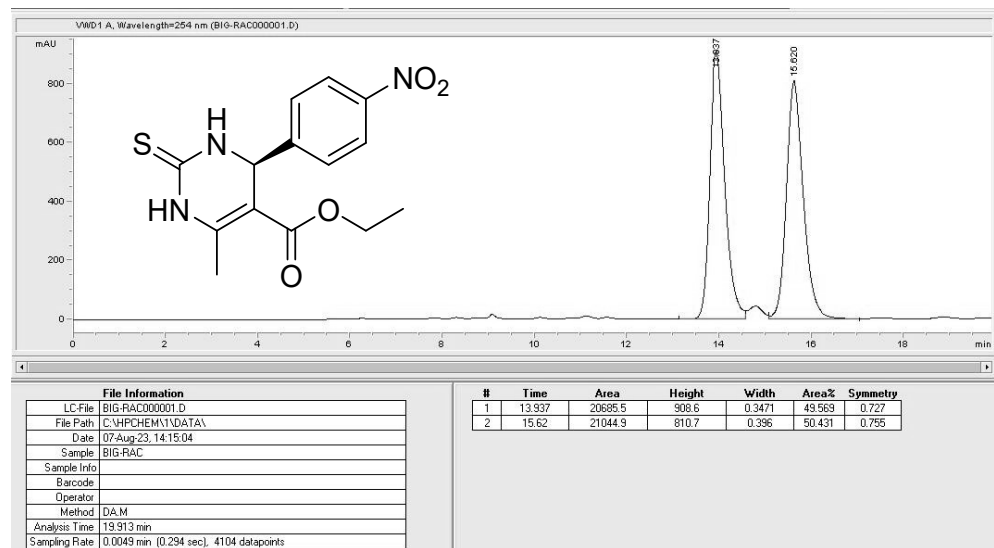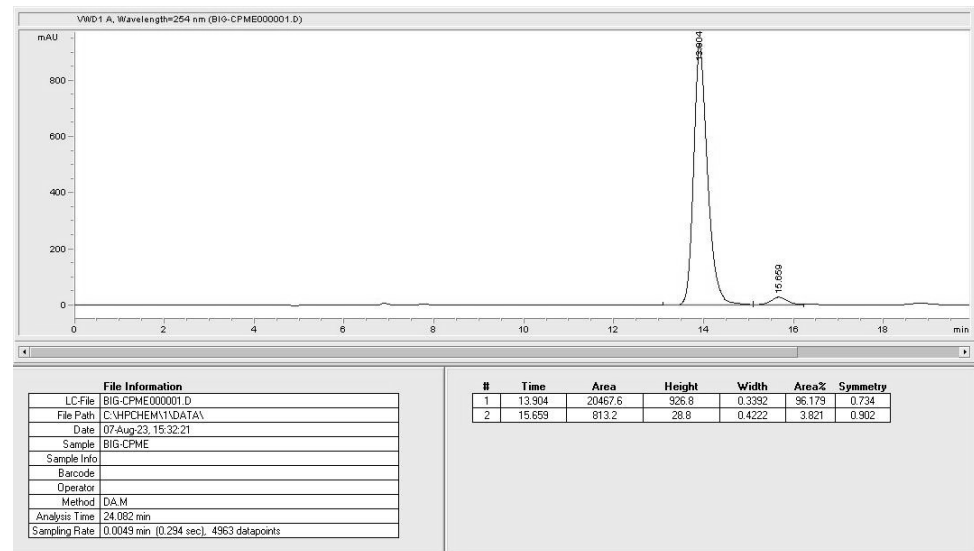

## References

1. L. Fang, A. Lin, H. Hu and C. Zhu, *Chemistry – A European Journal*, 2009, **15**, 7039-7043.
2. J. Skarżewski, M. Zielińska-Błajet and I. Turowska-Tyrk, *Tetrahedron: Asymmetry*, 2001, **12**, 1923-1928.
3. N. Li, X.-H. Chen, J. Song, S.-W. Luo, W. Fan and L.-Z. Gong, *Journal of the American Chemical Society*, 2009, **131**, 15301-15310.
4. K. K. Popov, J. L. Campbell, O. Kysilka, J. Hosek, C. D. Davies, M. Pour and P. Kocovsky, *The Journal of Organic Chemistry*, 2021, **87**, 920-943.
5. N. Amri and T. Wirth, *The Journal of Organic Chemistry*, 2021, **86**, 15961-15972.
